# Supplementary material for: Decomposability of soil organic matter over time: The Soil Incubation Database (SIDb, version 1.0) and guidance for incubation procedures
Source: Copernicus journal article supplement (doi:10.5194/essd-2019-184), 2019-10-25
Supplement: Supplementary file 1 [file essd-2019-184-supplement.pdf]

1 **Supplement of:**  
2 **Decomposability of soil organic matter over time: The Soil Incubation Database (SIDb,**  
3 **version 1.0) and guidance for incubation procedures**

4  
5 In the main manuscript, we focused on essential variables to measure and report for inclusion in  
6 the Soil Incubation Database (SIDb). Here, we focus on suggested variables to measure and  
7 methods to consider that go beyond what is required for inclusion in SIDb but are nevertheless  
8 important to consider prior to and during soil incubations, both to increase interpretability of  
9 results and to allow for inter-site comparisons. Most of the recommendations made here are  
10 applicable for incubation studies using soils from any regions; however, some ecosystems may  
11 require reporting of additional variables.

12  
13 **Additional information on soil characteristics**

14 As explained in the main manuscript Table 1), soil depth and soil carbon (C) are the two most  
15 important and necessary soil characteristics to report for incubated soil samples.

16 In addition, it can be useful to measure pH values in the soil solution on a regular basis  
17 during the incubation for the following reasons; first, if the soil pH is more neutral or basic, C  
18 mineralization might be confounded by high carbonate concentrations (Billings et al., 2004);  
19 second, pH values are known to change over the course of an incubation, thereby possibly  
20 affecting both the microbial community composition (Fierer et al., 2007) and the solubility of  
21 CO<sub>2</sub> in the soil water, which has to be considered when calculating CO<sub>2</sub> flux rates from  
22 incubation studies. Additionally, microbial growth and many microbial nutrient cycling  
23 processes (e.g. N mineralization, nitrification and denitrification), and mineral-organic  
24 associations are affected by pH (Kalbitz and Kaiser, 2008).

25 Another variable to consider, particularly for anaerobic incubations, are soil redox  
26 conditions as they can have an important effect on the oxidation state of mineralized soil C  
27 released (Knorr and Blodau, 2009; Peters and Conrad, 1996). Accurately measuring soil redox  
28 potential in an incubation can be difficult and costly due to large spatial heterogeneity of soil  
29 redox conditions, however obtaining this information is valuable when interpreting results in the  
30 context of the potential for a soil to produce methane. Anoxic processes can occur at redox  
31 potentials (Eh) between +300 to -300 mV (DeLaune and Reddy, 2005). At higher redox values,

32 facultative anaerobic processes occur (e.g.  $\text{NO}_3^-$  reduction) followed by iron and sulfate  
33 reduction. Fermentation can occur over a wide range of redox values, and multi-step  
34 fermentation may be important in full mineralization under anoxic conditions (Meronigal et al.,  
35 2004). Before methanogenesis can occur, terminal electron acceptors higher on the redox ladder  
36 (e.g.  $\text{NO}_3^-$ , Fe(III),  $\text{SO}_4^{2-}$ ) must be depleted (Peters and Conrad, 1996) and the redox potential  
37 must be sufficiently negative (DeLaune and Reddy, 2005). Observations of methanogenesis at  
38 higher redox potentials have been made (Peters and Conrad, 1996), which is likely due to micro-  
39 scale variability in soil redox potential (Sexstone et al., 1985). Thus, the activity of soil  
40 microorganisms in anaerobic incubations has a large effect on the redox potential, and therefore  
41 the gas flux, as microbes exhaust electron acceptors that yield more energy than methanogenesis,  
42 which then finally allows methanogenic conditions to occur (Peters and Conrad, 1996; Tveit et  
43 al., 2013).

44         Simple microbial parameters that are usually well correlated with heterotrophic  
45 respiration rates are microbial biomass and microbial stoichiometry (Čapek et al., 2015).  
46 Microbial biomass is often estimated by the chloroform-fumigation extraction method, which  
47 also allows measuring microbial C and/or nitrogen and thus allows stoichiometric analyses.  
48 Other measures of microbial biomass use biomarkers, such as DNA or phospholipid fatty acids  
49 to estimate microbial biomass or activity-based methods, such as the substrate-induced  
50 respiration method.

51

## 52 **Incubation setup**

53 Experimental incubation setups commonly consist of either incubation jars, such as mason jars  
54 fitted with Swagelok bulkhead fittings and gas-tight septa, or incubation vials with silicone septa,  
55 which contain the incubated soil and ensure an airtight headspace for analytical measurements.  
56 Incubation vessels should always be cleaned and sterilized prior to beginning the experiment.  
57 One consideration in selecting the size of the incubation jars or vials is the size of the sample and  
58 potential for  $\text{CO}_2$  and/or  $\text{CH}_4$  production; the headspace must be small enough to detect a change  
59 in gas concentrations but not so small that the headspace reaches levels of  $\text{CO}_2$  beyond those  
60 expected in the field or under anoxic conditions.

61         Soil preparation includes the decision to homogenize soil via sieving or other methods, to  
62 remove roots, to maintain oxic or anoxic conditions, to optimize soil moisture, and whether to

63 pre-incubate the soils. Drying and grinding of soils should be avoided as this leads to  
64 mineralization of C released from organisms killed by drying and rapid rehydration as well as  
65 potentially releasing C that was physically protected, e.g. via aggregation (Carter and Gregorich,  
66 2007).

67         Avoiding disturbance effects caused by soil homogenization can be accomplished by  
68 cutting soil cores into sections and incubating each intact section. However, with intact cores,  
69 recently cut live roots remain in the soil and may artificially increase substrate availability and  
70 result in artifacts in the initial rates of CO<sub>2</sub> production. For anaerobic incubations, minimizing  
71 soil disturbance and exposure to oxygen during sampling, preparation and incubation is critical  
72 as exposure to oxygen can disrupt fermentation and methanogenesis, which can decrease the  
73 potential rates of CH<sub>4</sub> production (Nilsson and Öquist, 2013), at least during the initial stages of  
74 incubation. However, keeping soil cores and soil aggregates intact can result in anaerobic  
75 microsites within the soil during aerobic incubations (Knorr and Blodau, 2009), which may  
76 affect interpretation. Homogenizing soils disturbs the structure of soil aggregates and may  
77 eliminate the spatial disconnect between microbes and organic matter, thus leading to increased  
78 mineralization rates.

79         When examining long-term changes in aerobic C dynamics over time, it can be favorable  
80 to start out the incubation with multiple subsets of the same soil core in one jar and then  
81 repeatedly taking out one subset for detailed soil and microbial analysis over the course of  
82 incubation (there needs to be enough soil left for reliable flux measurements after samples are  
83 taken out for analysis). In summary, keeping soils intact without homogenizing prior to  
84 incubation will keep soils closer to field conditions but it will require a higher number of  
85 replicates to incubate as heterogeneity will be higher without homogenizing.

86         Pre-incubating soils is generally recommended as it reduces a confounding effect of high  
87 initial respiration rates that are due to a short-lived flush of respiration caused by sample  
88 collection and preparation even if soils are kept intact. Pre-incubation duration varies widely,  
89 from 0 to 180 days (Whitman et al., 2014). For studies in which soils are dried and rewetted, 2  
90 9 days is typical for soils to return to basal respiration rates of undried controls (Hamer et al.,  
91 2007) but may not return to basal rates even after more than 50 days depending on soil texture  
92 (Chowdhury et al., 2011). Based on the literature and our personal experience, we recommend at

93 least 4 days and preferably 7 days of preincubation, but caution that specific study questions may  
94 dictate shorter or longer preincubation periods.

95 Initial experimental setup requires recording jar weights of empty jars, determining soil  
96 moisture, and adding the prepared soil for incubation, and weighing and recording the soil plus  
97 jar weight. Using this weight as a benchmark and checking weekly to adjust soil moisture can  
98 ensure that soils do not become either waterlogged or water-stressed, both of which affect C  
99 fluxes. If anoxic conditions are desired, this step can be conducted in a glove box to ensure  
100 anoxia.

101

## 102 **Flux measurements**

103 The length and frequency of flux measurements are important for characterizing C fluxes in soil  
104 incubations. Aerobic respiration rates follow an exponential decline which requires frequent  
105 measurements at the beginning of the experiment to capture the depletion of fast cycling C.

106 Generally, at the beginning of an incubation, measurements are taken at short intervals for the  
107 first few weeks (every 2-3 days) and then extended to weekly measurements. Depending on the  
108 length of incubation, later measurements can be taken monthly or even yearly as there is little  
109 change in respiration rates once fast cycling C has been respired. Flux values should be closely  
110 monitored and the frequency of measurements adjusted if needed. Frequent flux measurements  
111 are especially important to characterize the shape of the time series curve when using inverse  
112 modeling to separate soil C into fast and slower cycling pools as discussed earlier. Frequent  
113 measurements even after the initial decline in respiration rate improve the detection limit of  
114 small differences in the slower cycling C pools (Schädel et al., 2013). Before beginning an  
115 incubation, jars should be flushed to ensure ambient CO<sub>2</sub> concentrations.

116 The duration of anaerobic incubations needs to be sufficiently long enough to achieve  
117 favorable conditions for CH<sub>4</sub> production, which can be inhibited by availability of alternate  
118 electron acceptors (Knorr and Blodau, 2009) and by methanogen communities (Tveit et al.,  
119 2013). During anaerobic incubations, CO<sub>2</sub> fluxes should be measured alongside CH<sub>4</sub> fluxes.

120

## 121 **Isotope Incubations**

122 The C isotope composition (<sup>13</sup>C and <sup>14</sup>C) of the bulk soil C pool as well as that of respired CO<sub>2</sub>  
123 and CH<sub>4</sub> reveals information on C dynamics and the age of soil C pools and of respired C

124 (Trumbore, 2000). In most cases, multiple measurements of the isotopic composition of respired  
125 gases are not possible during an incubation, however, radiocarbon measurements of the respired  
126 CO<sub>2</sub> at the end, or multiple measurements during the course of an incubation can provide  
127 valuable information on the age of the C being respired (Dioumaeva et al., 2002; Nowinski et al.,  
128 2010), giving insights into the decomposition of different C pool fractions over the course of an  
129 incubation. The isotopic signature (<sup>13</sup>C and <sup>14</sup>C values) of respired CO<sub>2</sub> in combination with  
130 different soil fractions (Biasi et al., 2005; Crow et al., 2006; Czimczik and Trumbore, 2007;  
131 Dioumaeva et al., 2002; Dutta et al., 2006) can be useful to identify the C sources that contribute  
132 to total C efflux.

133 Radiocarbon incubations, where the <sup>14</sup>C of respired CO<sub>2</sub> is measured, are a common type  
134 of incubation designed to use the radiocarbon signature to trace the transit time of C in the soil  
135 (e.g. Nagy et al., 2018; Schuur and Trumbore, 2006) or to partition heterotrophic and autotrophic  
136 respiration, which have different signatures (Carbone et al., 2011; Hicks Pries et al., 2013;  
137 Schuur and Trumbore, 2006). They are commonly short-term, involving one single radiocarbon  
138 measurement made at the end of the incubation. In contrast, standard non-radiocarbon  
139 incubations are often longer. In the design of incubation experiments, there are opportunities to  
140 combine radiocarbon and time series incubations as complementary methods to address related  
141 questions of C pool structures and transit times. Studies using <sup>14</sup>C should report time series of  
142 CO<sub>2</sub> in addition to the total duration in supplemental information or a data repository. Long-term  
143 incubation studies should be aware of the benefit of adding multiple <sup>14</sup>C measurements to further  
144 constrain the source or dynamics of the C pool/s respired. Since long-term incubations should  
145 initially release C predominantly from faster pools and then from slower pools, this behavior  
146 could be confirmed with measurements of the <sup>14</sup>C content of the respired CO<sub>2</sub> at different times  
147 during incubation.

148 Laboratory setup of radiocarbon incubations is similar to common setups used for time  
149 series measurements, with some additional considerations. First and foremost, sufficient CO<sub>2</sub>  
150 must be accumulated in the headspace to make a radiocarbon measurement (typically ~0.5mg C),  
151 which leads to the build-up of relatively high CO<sub>2</sub> concentrations. When deciding how to  
152 standardize the duration of the incubation across samples, three criteria are commonly used: (1)  
153 total amount of time elapsed (days), (2) total amount of C respired (mg C), or (3) fraction of  
154 initial soil C respired. In all cases, the criterion used should be reported, and the % of C respired

155 should be calculated and reported. Finally, although temperature and moisture should be highly  
156 controlled for time series incubations, the  $^{14}\text{C}$  signature of the respired C is much less sensitive to  
157 temperature, as the same C is consumed by microbes independent of incubation temperature,  
158 merely at a faster rate under warmer conditions (Hicks Pries et al., 2017) .

159

160 **References:**

161 Biasi, C., Rusalimova, O., Meyer, H., Kaiser, C., Wanek, W., Barsukov, P., Junger, H. and  
162 Richter, A.: Temperature-dependent shift from labile to recalcitrant carbon sources of arctic  
163 heterotrophs, *Rapid Communications in Mass Spectrometry*, 19(11), 1401–1408,  
164 doi:10.1002/rcm.1911, 2005.

165 Billings, S. A., Schaeffer, S. M. and Evans, R. D.: Soil microbial activity and N availability with  
166 elevated CO<sub>2</sub> in Mojave desert soils, *Global Biogeochemical Cycles*, 18(1),  
167 doi:10.1029/2003gb002137, 2004.

168 Čapek, P., Diáková, K., Dickopp, J.-E., Bárta, J., Wild, B., Schneckner, J., Alves, R. J. E.,  
169 Aiglsdorfer, S., Guggenberger, G., Gentsch, N., Hugelius, G., Lashchinsky, N., Gittel, A.,  
170 Schleper, C., Mikutta, R., Palmtag, J., Shibistova, O., Urich, T., Richter, A. and Šantrůčková, H.:  
171 The effect of warming on the vulnerability of subducted organic carbon in arctic soils, *Soil*  
172 *Biology and Biochemistry*, 90, 19–29, doi:10.1016/j.soilbio.2015.07.013, 2015.

173 Carbone, M. S., Still, C. J., Ambrose, A. R., Dawson, T. E., Williams, A. P., Boot, C. M.,  
174 Schaeffer, S. M. and Schimel, J. P.: Seasonal and episodic moisture controls on plant and  
175 microbial contributions to soil respiration, *Oecologia*, 167(1), 265–278, doi:10.1007/s00442-  
176 011-1975-3, 2011.

177 Carter, M. R. and Gregorich, E. G.: *Soil Sampling and Methods of Analysis*, 2nd ed., CRC  
178 Press., 2007.

179 Chowdhury, N., Burns, R. G. and Marschner, P.: Recovery of soil respiration after drying, *Plant*  
180 *Soil*, 348(1), 269, doi:10.1007/s11104-011-0871-2, 2011.

- 181 Crow, S. E., Sulzman, E. W., Rugh, W. D., Bowden, R. D. and Lajtha, K.: Isotopic analysis of  
182 respired CO<sub>2</sub> during decomposition of separated soil organic matter pools, *Soil Biology &*  
183 *Biochemistry*, 38(11), 3279–3291, doi:10.1016/j.soilbio.2006.04.007, 2006.
- 184 Czimczik, C. I. and Trumbore, S. E.: Short-term controls on the age of microbial carbon sources  
185 in boreal forest soils, *Journal of Geophysical Research-Biogeosciences*, 112(G3),  
186 doi:10.1029/2006jg000389, 2007.
- 187 DeLaune, R. D. and Reddy, K. R.: Redox Potential, in *Encyclopedia of Soils in the Environment*,  
188 edited by D. Hillel, pp. 366–371, Elsevier, Oxford. [online] Available from:  
189 <http://www.sciencedirect.com/science/article/pii/B0123485304002125>, 2005.
- 190 Dioumaeva, I., Trumbore, S., Schuur, E. A. G., Goulden, M. L., Litvak, M. and Hirsch, A. I.:  
191 Decomposition of peat from upland boreal forest: Temperature dependence and sources of  
192 respired carbon, *Journal of Geophysical Research-Atmospheres*, 108(D3),  
193 doi:10.1029/2001jd000848, 2002.
- 194 Dutta, K., Schuur, E. A. G., Neff, J. C. and Zimov, S. A.: Potential carbon release from  
195 permafrost soils of Northeastern Siberia, *Global Change Biology*, 12(12), 2336–2351,  
196 doi:10.1111/j.1365-2486.2006.01259.x, 2006.
- 197 Fierer, N., Morse, J. L., Berthrong, S. T., Bernhardt, E. S. and Jackson, R. B.: Environmental  
198 controls on the landscape-scale biogeography of stream bacterial communities, *Ecology*, 88(9),  
199 2162–2173, doi:10.1890/06-1746.1, 2007.
- 200 Hamer, U., Unger, M. and Makeschin, F.: Impact of air-drying and rewetting on PLFA profiles  
201 of soil microbial communities, *Journal of Plant Nutrition and Soil Science*, 170(2), 259–264,  
202 doi:10.1002/jpln.200625001, 2007.
- 203 Hicks Pries, C. E., Schuur, E. A. G. and Crummer, K. G.: Thawing permafrost increases old soil  
204 and autotrophic respiration in tundra: Partitioning ecosystem respiration using  $\delta^{13}\text{C}$  and  $\Delta^{14}\text{C}$ ,  
205 *Global Change Biology*, 19(2), 649–661, doi:10.1111/gcb.12058, 2013.
- 206 Hicks Pries, C. E., Castanha, C., Porras, R. C. and Torn, M. S.: The whole-soil carbon flux in  
207 response to warming, *Science*, 355(6332), 1420–1423, doi:10.1126/science.aal1319, 2017.

208 Kalbitz, K. and Kaiser, K.: Contribution of dissolved organic matter to carbon storage in forest  
209 mineral soils, *Journal of Plant Nutrition and Soil Science*, 171(1), 52–60,  
210 doi:10.1002/jpln.200700043, 2008.

211 Knorr, K.-H. and Blodau, C.: Impact of experimental drought and rewetting on redox  
212 transformations and methanogenesis in mesocosms of a northern fen soil, *Soil Biology &  
213 Biochemistry*, 41(6), 1187–1198, doi:10.1016/j.soilbio.2009.02.030, 2009.

214 Megonigal, J. P., Hines, M. E. and Visscher, P. T.: Anaerobic metabolism: linkages to trace  
215 gases and aerobic processes, [online] Available from:  
216 <http://repository.si.edu/handle/10088/15579> (Accessed 8 August 2019), 2004.

217 Nagy, R. C., Porder, S., Brando, P., Davidson, E. A., Figueira, A. M. e S., Neill, C., Riskin, S.  
218 and Trumbore, S.: Soil Carbon Dynamics in Soybean Cropland and Forests in Mato Grosso,  
219 Brazil, *Journal of Geophysical Research: Biogeosciences*, 123(1), 18–31,  
220 doi:10.1002/2017JG004269, 2018.

221 Nilsson, M. and Öquist, M.: Partitioning Litter Mass Loss into Carbon Dioxide and Methane in  
222 Peatland Ecosystems, in *Carbon Cycling in Northern Peatlands*, pp. 131–144, American  
223 Geophysical Union. [online] Available from: <http://dx.doi.org/10.1029/2008GM000819>, 2013.

224 Nowinski, N. S., Taneva, L., Trumbore, S. E. and Welker, J. M.: Decomposition of old organic  
225 matter as a result of deeper active layers in a snow depth manipulation experiment, *Oecologia*,  
226 163(3), 785–792, doi:10.1007/s00442-009-1556-x, 2010.

227 Peters, V. and Conrad, R.: Sequential reduction processes and initiation of CH<sub>4</sub> production upon  
228 flooding of oxic upland soils, *Soil Biology & Biochemistry*, 28(3), 371–382, doi:10.1016/0038-  
229 0717(95)00146-8, 1996.

230 Schädel, C., Luo, Y., Evans, D. R., Fei, S. and Schaeffer, S. M.: Separating soil CO<sub>2</sub> efflux into  
231 C-pool-specific decay rates via inverse analysis of soil incubation data, *Oecologia*, 171(3), 721–  
232 732, doi:10.1007/s00442-012-2577-4, 2013.



233 Schuur, E. A. G. and Trumbore, S. E.: Partitioning sources of soil respiration in boreal black  
234 spruce forest using radiocarbon, *Global Change Biology*, 12(2), 165–176, doi:10.1111/j.1365-  
235 2486.2005.01066.x, 2006.

236 Sexstone, A. J., Revsbech, N. P., Parkin, T. B. and Tiedje, J. M.: Direct measurement of oxygen  
237 profiles and denitrification rates in soil aggregates, *Soil Science Society of America Journal*,  
238 49(3), 645–651, 1985.

239 Trumbore, S. E.: Age of soil organic matter and soil respiration: Radiocarbon constraints on  
240 belowground C dynamics, *Ecological Applications*, 10(2), 399–411, doi:10.2307/2641102, 2000.

241 Tveit, A., Schwacke, R., Svenning, M. M. and Urich, T.: Organic carbon transformations in  
242 high-Arctic peat soils: key functions and microorganisms, *Isme Journal*, 7(2), 299–311,  
243 doi:10.1038/ismej.2012.99, 2013.

244 Whitman, T., Zhu, Z. and Lehmann, J.: Carbon Mineralizability Determines Interactive Effects  
245 on Mineralization of Pyrogenic Organic Matter and Soil Organic Carbon, *Environ. Sci. Technol.*,  
246 48(23), 13727–13734, doi:10.1021/es503331y, 2014.

247
